# Supplementary material for: Enhanced photoelectrical performance of chemically processed SnS2 nanoplates
Source: Royal Society of Chemistry journal article supplement (doi:10.1039/c6ra20491k), 2016-01-01
Supplement: c6ra20491k1.pdf [file c6ra20491k1.pdf]

## **Supplementary Information**

### **Enhanced photoelectrical performance of chemically processed SnS<sub>2</sub> nanoplates**

G. Mohan Kumar, Fu Xiao, P. Ilanchezhiyan\*, Sh.Yuldashev, and T. W. Kang

Nano-Information Technology Academy (NITA), Dongguk University, Seoul, Republic of  
Korea.

E-mail: [ilancheziyan@dongguk.edu](mailto:ilancheziyan@dongguk.edu)

Fax: +82 2 2278 4519; Tel: +82 10 2178 0077

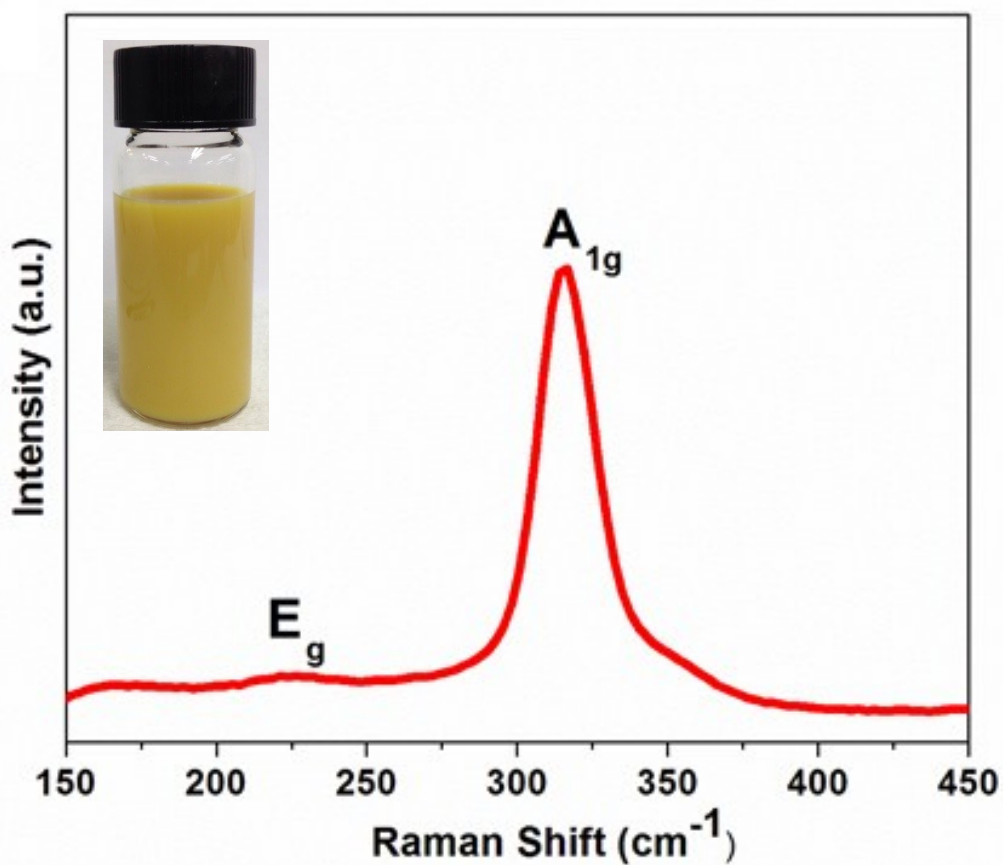

Fig. S1. Raman spectrum of SnS<sub>2</sub> nanoplates and inset shows the photograph of the SnS<sub>2</sub> suspensions

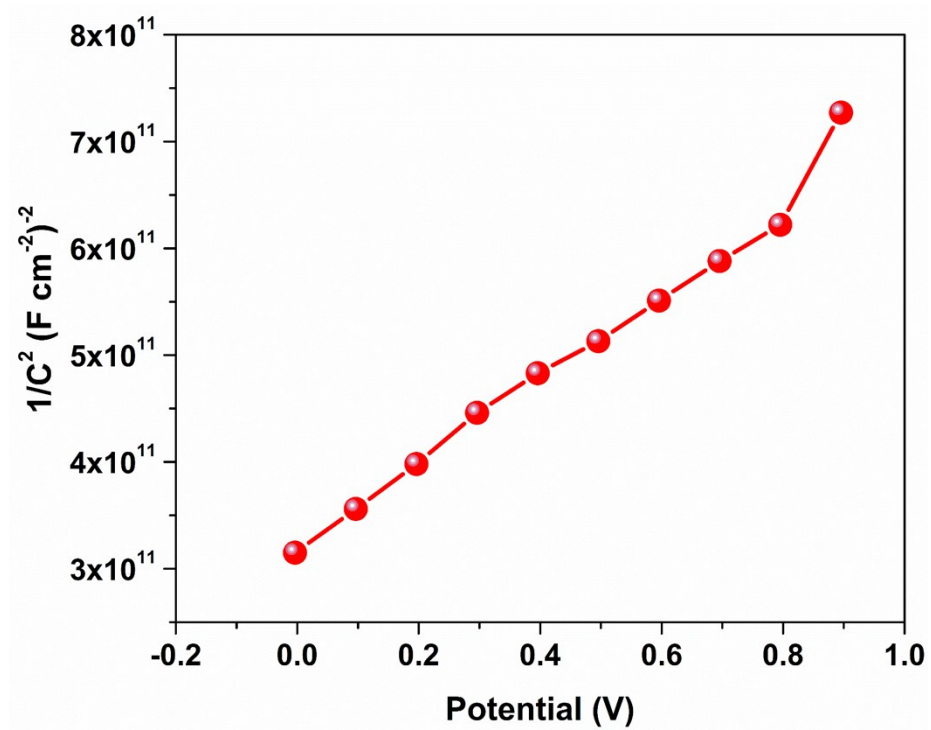

Figure S2. Mott- Schottky plots of SnS<sub>2</sub> nanoplates.

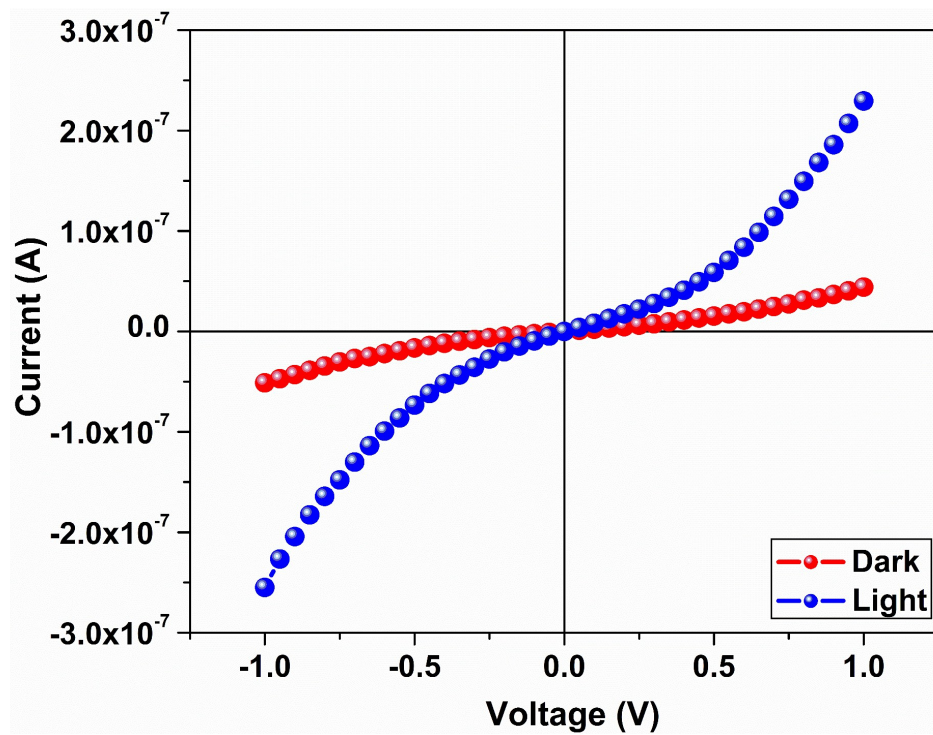

Figure S3. I-V characteristics of lateral SnS<sub>2</sub> device under dark and light illumination.
